# Supplementary material for: An open-label multicenter study to assess the safety of dextromethorphan/quinidine in patients with pseudobulbar affect associated with a range of underlying neurological conditions
Source: PubMed Central journal article supplement (PMC4743597; doi:10.1185/03007995.2014.940040), 2014-07-28
Supplement: icmo_a_940040_sm0001.pdf [file icmo_a_940040_sm0001.pdf]

## An Open-Label Multicenter Study to Assess the Safety of Dextromethorphan-Quinidine in Patients with Pseudobulbar Affect Associated with a Range of Underlying Neurological Conditions

**Journal name:** *CNS Drugs*

Gary L. Pattee, James P. Wymer, Catherine Lomen-Hoerth, Stanley H. Appel, Andrea E. Formella, and Laura E. Pope

### Corresponding Author:

Gary L. Pattee, MD  
Neurology Associates, PC  
2631 South 70<sup>th</sup> Street  
Lincoln, NE 68506, USA  
e-mail: glpattee@gmail.com

### Online Resource 1 Post hoc analysis of treatment-related adverse events (TRAEs)

| TRAE <sup>a</sup>                                                                             | Patients with TRAE (n) | Time to first onset of TRAE (median days) <sup>b</sup> | Duration of TRAE (median days) <sup>c</sup> | Patients with recurrent TRAE <sup>d</sup> (n) | Study days with TRAE present <sup>e</sup> (median %) |
|-----------------------------------------------------------------------------------------------|------------------------|--------------------------------------------------------|---------------------------------------------|-----------------------------------------------|------------------------------------------------------|
| <b>All subjects: N = 553</b>                                                                  |                        |                                                        |                                             |                                               |                                                      |
| Nausea                                                                                        | 65                     | 4.0                                                    | 3.0                                         | 13                                            | 3.0%                                                 |
| Dizziness                                                                                     | 58                     | 4.5                                                    | 2.0                                         | 12                                            | 2.0%                                                 |
| Headache                                                                                      | 55                     | 7.0                                                    | 2.0                                         | 23                                            | 2.0%                                                 |
| Somnolence                                                                                    | 39                     | 8.0                                                    | 8.0                                         | 10                                            | 21.5%                                                |
| Fatigue                                                                                       | 39                     | 8.0                                                    | 16.0                                        | 11                                            | 22.0%                                                |
| Diarrhea                                                                                      | 36                     | 7.5                                                    | 2.0                                         | 5                                             | 5.5%                                                 |
| Dry mouth                                                                                     | 28                     | 4.5                                                    | 3.0                                         | 3                                             | 16.0%                                                |
| <b>Patients who did not discontinue (for any reason) prior to TRAE resolution<sup>f</sup></b> |                        |                                                        |                                             |                                               |                                                      |
| Nausea                                                                                        | 49                     | —                                                      | 2.0                                         | 9                                             | 1.0%                                                 |

|            |    |   |      |    |       |
|------------|----|---|------|----|-------|
| Dizziness  | 42 | — | 2.0  | 9  | 1.0%  |
| Headache   | 46 | — | 2.0  | 22 | 1.0%  |
| Somnolence | 31 | — | 11.0 | 6  | 9.0%  |
| Fatigue    | 32 | — | 21.5 | 9  | 11.5% |
| Diarrhea   | 26 | — | 2.0  | 5  | 1.5%  |
| Dry mouth  | 20 | — | 5.5  | 1  | 8.0%  |

Median time to discontinuation for any TRAE: 16.5 days

<sup>a</sup> TRAEs are those where relationship to treatment is assessed as possible, probable, highly probable, or missing. Median onset and duration are computed only for patients with a TRAE

<sup>b</sup> Time in days from first dose to first onset of the TRAE during the treatment phase

<sup>c</sup> Duration in days from TRAE onset to TRAE resolution. For patients with more than one occurrence of the TRAE, the longest duration is reported. For subjects who discontinued prior to resolution, the date of last dose during the treatment phase is used to compute duration

<sup>d</sup> Number who experience the specific TRAE more than once

<sup>e</sup> Percentage of study days with TRAE present for each patient is the number of total study days with this TRAE (includes all occurrences of the AE) divided by total number of days patient participated in study. Total participation for each patient equals date of last dose minus date of first dose plus 1. If date of last dose is missing, date of last visit is used

<sup>f</sup> Excludes patients who discontinued for any reason prior to resolution of the TRAE in question. Analyzing only patients who did not discontinue prior to TRAE resolution avoids artificially censoring the TRAE duration due to dropout; onset is not calculated for this group since TRAE onset is not affected by subsequent discontinuation

# An Open-Label Multicenter Study to Assess the Safety of Dextromethorphan-Quinidine in Patients with Pseudobulbar Affect Associated with a Range of Underlying Neurological Conditions

**Journal name:** *CNS Drugs*

Gary L. Pattee, James P. Wymer, Catherine Lomen-Hoerth, Stanley H. Appel, Andrea E. Formella, and Laura E. Pope

**Corresponding Author:**

Gary L. Pattee, MD  
 Neurology Associates, PC  
 2631 South 70<sup>th</sup> Street  
 Lincoln, NE 68506, USA  
 e-mail: glpattee@gmail.com

**Online Resource 2** Incidence of SAEs reported during the study by  $\geq 2$  patients in any primary-neurological-condition category (safety population)

| Primary neurological <sup>a</sup> condition | SAE                           | % (n)     |
|---------------------------------------------|-------------------------------|-----------|
| AD/dementia                                 | Cerebrovascular accident      | 11.8 (2)  |
|                                             | MS aggravated                 | 5.8 (13)  |
| MS                                          | Myocardial infarction         | 0.9 (2)   |
|                                             | DVT                           | 0.9 (2)   |
| Stroke/CBVD                                 | Cerebrovascular accident      | 3.9 (2)   |
| ALS/MND                                     | Respiratory failure           | 18.1 (36) |
|                                             | Dysphagia                     | 9.5 (19)  |
|                                             | Pneumonia NOS                 | 4.0 (8)   |
|                                             | Amyotrophic lateral sclerosis | 2.0 (4)   |
|                                             | Weight decreased              | 2.0 (4)   |
|                                             | Cardiac arrest                | 1.5 (3)   |
|                                             | Laceration                    | 1.5 (3)   |
|                                             | Dyspnea                       | 1.5 (3)   |
|                                             | Gastrostomy                   | 1.5 (3)   |
|                                             | Hip fracture                  | 1.5 (3)   |
|                                             | Epistaxis                     | 1.0 (2)   |
|                                             | Aspiration pneumonia          | 1.0 (2)   |
|                                             | Postoperative wound infection | 1.0 (2)   |

*AD* Alzheimer's disease, *ALS* amyotrophic lateral sclerosis, *CBVD* cerebrovascular disorders, *DVT* deep-vein thrombosis, *MND* motor neuron disease, *MS* multiple sclerosis, *NOS* not otherwise specified, *PBA* pseudobulbar affect, *PD* Parkinson's disease, *SAE* serious adverse event, *TBI* traumatic brain injury

<sup>a</sup> No SAE occurred in  $\geq 2$  patients in the TBI, PD/movement disorders, or other PBA groups

## An Open-Label Multicenter Study to Assess the Safety of Dextromethorphan-Quinidine in Patients with Pseudobulbar Affect Associated with a Range of Underlying Neurological Conditions

**Journal name:** *CNS Drugs*

Gary L. Pattee, James P. Wymer, Catherine Lomen-Hoerth, Stanley H. Appel, Andrea E. Formella, and Laura E. Pope

### Corresponding Author:

Gary L. Pattee, MD  
Neurology Associates, PC  
2631 South 70<sup>th</sup> Street  
Lincoln, NE 68506, USA  
e-mail: glpattee@gmail.com

### Online Resource 3 AEs leading to discontinuation of $\geq 1\%$ of patients (safety population)

| Preferred term, % (n) | AD/dementia (n = 17) | MS (n = 223) | Stroke/CBVD (n = 51) | TBI (n = 23) | ALS/MND (n = 199) | PD/movement disorders (n = 23) | Other PBA (n = 17) | Total (N = 553) |
|-----------------------|----------------------|--------------|----------------------|--------------|-------------------|--------------------------------|--------------------|-----------------|
| Any AE                | 35.3 (6)             | 16.6 (37)    | 23.5 (12)            | 13.0 (3)     | 40.2 (80)         | 39.1 (9)                       | 11.8 (2)           | 26.9 (149)      |
| Respiratory failure   | 0 (0)                | 0 (0)        | 0 (0)                | 0 (0)        | 14.1 (28)         | 0 (0)                          | 0 (0)              | 5.1 (28)        |
| Nausea                | 0 (0)                | 1.8 (4)      | 2.0 (1)              | 0 (0)        | 6.0 (12)          | 4.3 (1)                        | 0 (0)              | 3.3 (18)        |
| Dizziness             | 0 (0)                | 2.2 (5)      | 3.9 (2)              | 0 (0)        | 2.0 (4)           | 17.4 (4)                       | 5.9 (1)            | 2.9 (16)        |
| Headache              | 0 (0)                | 1.8 (4)      | 2.0 (1)              | 0 (0)        | 2.5 (5)           | 8.7 (2)                        | 5.9 (1)            | 2.4 (13)        |
| Diarrhea              | 5.9 (1)              | 0.4 (1)      | 2.0 (1)              | 0 (0)        | 3.0 (6)           | 0 (0)                          | 5.9 (1)            | 1.8 (10)        |

|                       |         |         |         |         |         |         |       |          |
|-----------------------|---------|---------|---------|---------|---------|---------|-------|----------|
| Somnolence            | 0 (0)   | 1.8 (4) | 3.9 (2) | 0 (0)   | 2.0 (4) | 0 (0)   | 0 (0) | 1.8 (10) |
| Weakness              | 0 (0)   | 0.9 (2) | 2.0 (1) | 4.3 (1) | 2.0 (4) | 4.3 (1) | 0 (0) | 1.6 (9)  |
| Dry mouth             | 0 (0)   | 1.3 (3) | 2.0 (1) | 0 (0)   | 2.0 (4) | 0 (0)   | 0 (0) | 1.4 (8)  |
| Fatigue               | 0 (0)   | 1.3 (3) | 0 (0)   | 4.3 (1) | 1.5 (3) | 4.3 (1) | 0 (0) | 1.4 (8)  |
| Insomnia              | 0 (0)   | 0.4 (1) | 3.9 (2) | 0 (0)   | 2.0 (4) | 0 (0)   | 0 (0) | 1.3 (7)  |
| Appetite<br>decreased | 5.9 (1) | 0.4 (1) | 0 (0)   | 0 (0)   | 2.0 (4) | 0 (0)   | 0 (0) | 1.1 (6)  |

---

*AD* Alzheimer's disease, *AE* adverse event, *ALS* amyotrophic lateral sclerosis, *CBVD* cerebrovascular disorders, *MND* motor neuron disease, *MS* multiple sclerosis, *PBA* pseudobulbar affect, *PD* Parkinson's disease, *TBI* traumatic brain injury

# An Open-Label Multicenter Study to Assess the Safety of Dextromethorphan-Quinidine in Patients with Pseudobulbar Affect Associated with a Range of Underlying Neurological Conditions

**Journal name:** *CNS Drugs*

Gary L. Pattee, James P. Wymer, Catherine Lomen-Hoerth, Stanley H. Appel, Andrea E. Formella, and Laura E. Pope

**Corresponding Author:**

Gary L. Pattee, MD  
 Neurology Associates, PC  
 2631 South 70<sup>th</sup> Street  
 Lincoln, NE 68506, USA  
 e-mail: glpattee@gmail.com

**Online Resource 4** QT-interval changes

| Parameter/<br>time point | Absolute value |                   |                | Change from screening value |                   |                 |
|--------------------------|----------------|-------------------|----------------|-----------------------------|-------------------|-----------------|
|                          | <i>n</i>       | Statistic         | Value          | <i>n</i>                    | Statistic         | Value           |
| <b>QTcF, msec</b>        |                |                   |                |                             |                   |                 |
| Screening                | 550            | Mean (SD)         | 402 (19.1)     | n/a                         | n/a               | n/a             |
|                          |                | Median (min, max) | 402 (345, 463) |                             |                   |                 |
| Day 29                   | 465            | Mean (SD)         | 405 (18.8)     | 463                         | Mean (SD)         | +3.1 (15.9)     |
|                          |                | Median (min, max) | 405 (359, 476) |                             | Median (min, max) | +2.2 (−76, 52)  |
| Week 52/<br>Final Visit  | 399            | Mean (SD)         | 406 (20.3)     | 396                         | Mean (SD)         | +3.2 (18.3)     |
|                          |                | Median (min, max) | 405 (283, 480) |                             | Median (min, max) | +3.4 (−125, 66) |
| <b>QTcB, msec</b>        |                |                   |                |                             |                   |                 |
| Screening                | 550            | Mean (SD)         | 412 (21.3)     | n/a                         | n/a               | n/a             |
|                          |                | Median (min, max) | 410 (349, 479) |                             |                   |                 |
| Day 29                   | 465            | Mean (SD)         | 415 (20.0)     | 463                         | Mean (SD)         | +3.7 (18.1)     |
|                          |                | Median (min, max) | 415 (365, 473) |                             | Median (min, max) | +3.0 (−65, 69)  |
| Week 52/<br>Final Visit  | 399            | Mean (SD)         | 416 (21.7)     | 396                         | Mean (SD)         | +4.6 (21.5)     |
|                          |                | Median (min, max) | 414 (294, 491) |                             | Median (min, max) | +5.0 (−123, 83) |



*n/a* not available, QTcB QT interval corrected by Bazett's method, *QTcF* QT interval corrected by Fredericia's method, *SD* standard deviation
